# Supplementary material for: Succession of the turkey gastrointestinal bacterial microbiome related to weight gain
Source: PeerJ. 2013 Dec 23;1:e237. doi: 10.7717/peerj.237 (PMC3883494; doi:10.7717/peerj.237)
Supplement: Table S2 [file peerj-01-237-s008.xlsx]

## Sheet: Sheet1
#OTU ID	Top hit taxonomic classification	CFW11	CFW12	CFW13	CFW14	CFW15	CFW16	CFW17	CFW18	CFW19	CFW110	CFW21	CFW210	CFW22	CFW23	CFW24	CFW25	CFW26	CFW27	CFW28	CFW29	CFW31	CFW310	CFW32	CFW33	CFW34	CFW35	CFW36	CFW37	CFW38	CFW39	CFW41	CFW410	CFW42	CFW43	CFW44	CFW45	CFW46	CFW47	CFW48	CFW49	CFW51	CFW510	CFW52	CFW53	CFW54	CFW55	CFW56	CFW57
denovo9655	Lactobacillus salivarius	16383	19476	7919	14320	18597	13758	18379	12272	16440	839	8004	7226	18246	15293	7837	4109	1705	15716	357	7727	10852	11019	13425	19523	17317	8984	15778	11740	17768	4433	140	123	47	7049	183	4179	4855	333	7451	3604	947	2977	350	8987	1058	3369	5041	3820
denovo2991	Lactobacillus acidophilus/crispatus/helveticus	49	324	86	2545	20	899	17	3608	498	12076	8090	9658	804	2122	6922	746	10834	3660	13609	11257	5636	1180	211	19	368	9143	930	2865	70	358	4792	260	206	408	2501	231	1725	189	1153	1420	344	678	202	216	300	1726	392	988
denovo2305	Lactobacillus aviarius	47	3	0	4	4	9	2	2	8	10	6	71	10	9	7	5	0	16	1	0	77	65	17	2	7	10	232	38	27	18	152	30	38	174	8274	345	170	8050	450	5598	130	2170	50	449	5806	1113	200	3428
denovo822	Lactobacillus johnsonii	1	1	3	2	0	2	0	3	1	2	1	4	2	1	5	5	0	3	1	1	3	14	6	1	1	3	2	5	3	1	2499	1278	53	6682	1221	2303	9368	3617	1292	1811	13714	11564	425	6839	2755	11391	9684	1150
denovo5901	Clostridium XI	8	0	11	3	1	1	0	1	4	0	1	1	6	7	0	21	0	0	0	2	0	11	6	0	2	0	2	15	2	5	3	1	2	1	0	1	1	7	2	0	15	32	1610	175	80	5	4	13
denovo9105	Lactobacillus reuteri/vaginalis	17	5	36	2068	10	340	9	1527	45	2377	3253	1317	106	1101	4248	331	5846	349	5048	342	2246	841	607	4	37	1058	1288	1566	72	13	9684	374	183	2932	5521	820	1553	1709	5087	1414	3074	495	207	737	381	708	2832	7579
denovo6313	Candidatus Arthromitus	3	0	0	0	2	1	0	0	1	2	0	1	1	1	1	0	1	1	0	1	3	7	2	0	2	2	1	1	0	0	30	13352	16122	187	842	11296	939	4051	39	3470	33	171	396	35	1120	2	27	2
denovo5684	Enterococcus	176	8	4472	216	98	608	295	804	1353	19	1	10	220	89	17	73	2	0	0	7	104	168	12	6	1	0	135	41	10	4	1	0	35	1	2	2	2	1	0	1	0	1	2	2	10	0	0	2
denovo3204	Escherichia coli	3	85	322	243	650	80	270	401	9	0	0	6	25	8	13	13	0	14	0	2	43	132	111	36	36	0	201	99	13	17	0	0	1	0	5	5	0	3	1	1	0	4	11	17	29	0	0	0
denovo9538	Roseburia	436	16	1175	68	99	1274	206	248	423	1547	4	102	26	224	4	271	10	7	7	35	2	932	561	6	20	40	59	356	75	2312	25	597	995	81	90	29	81	302	53	133	114	188	507	94	1322	79	34	198
denovo5588	Bifidobacterium	102	5	252	55	125	47	125	10	42	5	2	183	26	272	2	226	3	3	3	26	2	418	795	4	18	21	40	396	64	362	3	303	427	79	141	43	109	311	56	197	31	178	225	88	2656	75	20	73
denovo4566	Lactobacillus ingluviei	0	0	0	0	0	0	1	0	0	0	0	0	0	0	2	1	0	0	1	0	0	4	0	0	1	0	0	1	2	1	603	19	45	306	402	433	106	100	2489	770	527	304	98	1122	40	549	741	844
denovo80	Corynebacterium	1112	1	1094	3	2	44	11	0	16	10	0	43	3	8	48	141	2	0	0	29	36	357	155	103	948	3	234	195	181	37	8	4	6	194	4	15	12	107	4	58	2	6	5	10	16	0	0	74
denovo3504	Unclassified bacteria	326	0	257	98	9	143	104	14	134	5	1	118	41	36	2	246	1	9	6	4	6	164	24	1	25	1	37	235	9	74	0	263	67	3	3	82	53	44	0	14	13	34	12372	39	222	16	5	59
denovo7397	Pseudomonas	0	0	0	0	0	0	0	0	0	0	0	0	0	0	0	2	0	0	0	0	0	0	0	0	0	0	0	0	0	0	0	0	0	0	0	0	0	0	0	0	0	0	0	0	0	0	0	0
denovo7590	Streptococcus	0	0	1	0	0	1	1	0	0	0	0	2	2	0	0	16	0	0	0	1	0	0	1	0	0	0	0	0	2	5	0	0	0	0	0	0	0	0	0	0	0	8	3	1	1	0	0	1
denovo170	Blautia	300	10	951	69	111	550	114	129	164	416	3	97	27	155	5	194	6	3	2	29	0	392	302	1	7	22	48	179	53	2555	25	232	426	29	45	13	36	134	30	47	33	121	199	43	435	39	25	101
denovo2992	Faecalibacterium	1	0	6	0	1	2	1	1	0	104	0	6	1	12	0	6	1	0	0	0	0	319	710	1	4	12	6	55	9	1899	3	320	38	18	29	0	14	33	14	1	5	39	79	7	66	43	24	62
denovo6147	Carnobacteriaceae family	0	0	0	0	0	0	0	0	0	0	0	0	0	0	0	0	0	0	0	0	0	0	0	0	0	0	0	0	0	0	0	0	0	0	0	0	0	0	0	0	0	0	0	0	0	0	0	0
denovo1341	Staphylococcus	31	0	80	3	0	3	5	0	16	3	2	8	3	10	9	3749	5	12	1	7	18	145	289	51	300	2	232	66	343	38	3	16	16	30	3	5	11	60	1	183	0	6	0	5	10	1	1	2
denovo1014	Megamonas	0	0	11	0	0	0	1	0	0	0	0	168	1	6	8	171	0	2	2	3	1	412	495	1	8	20	2	206	8	820	4	334	93	4	13	4	32	44	24	32	8	13	294	92	1050	42	6	40
denovo9412	Weissella	110	1	481	2	5	6	10	0	7	0	5	40	6	15	8	6734	5	4	0	3	6	65	160	6	39	0	107	26	426	7	0	6	7	4	0	3	2	2	0	73	0	0	1	2	6	1	2	1
denovo3505	Streptophyta	90	1	157	4	8	44	24	6	37	0	5	239	76	50	22	362	10	20	2	59	16	280	74	13	143	2	36	437	267	178	1	4	1	10	7	9	11	28	2	27	0	91	4	32	31	3	1	6
denovo9357	Staphylococcus	28	0	40	1	0	6	0	0	3	0	0	0	0	1	1	8	2	0	0	0	1	10	12	5	7	0	11	10	2	2	0	5	4	1	0	1	2	8	0	5	0	7	2	1	12	1	0	48
denovo6534	Weissella	0	0	5	0	0	0	0	0	0	0	0	0	0	1	0	0	0	0	0	0	0	0	0	0	0	0	0	0	0	0	0	0	0	0	0	0	0	0	0	0	0	0	0	0	0	0	0	0
denovo9938	Gemmiger	35	0	39	3	0	32	2	1	2	0	0	41	2	13	1	564	1	1	0	9	0	283	80	2	4	24	8	99	5	344	0	124	69	9	8	4	16	72	8	8	5	35	41	11	117	9	7	28
denovo4423	Clostridiaceae 1	11	0	16	0	0	2	3	0	2	0	0	0	1	3	1	1	0	0	0	0	0	9	5	0	1	0	2	5	4	9	0	0	0	0	0	0	0	1	0	0	1	5	3	5	6	1	1	0
denovo8130	Lachnospiraceae family	41	1	143	12	14	215	13	40	54	155	0	16	15	19	0	22	0	0	0	3	0	113	80	0	0	10	5	59	18	457	8	108	61	7	11	5	7	26	6	9	13	43	78	15	129	7	6	45
denovo8057	Lactobacillus sp.	0	0	0	22	3	0	0	40	0	116	126	22	1	8	191	1	511	21	347	34	183	0	10	0	0	78	23	5	2	0	663	0	0	443	90	0	113	2	255	62	327	5	1	36	8	78	202	85
denovo806	Helicobacter	33	0	58	1	19	59	154	10	87	131	24	43	59	52	5	455	1	29	19	2	47	335	77	7	23	2	10	308	53	48	0	88	2	5	115	73	90	209	2	20	2	35	83	142	118	6	9	19
denovo7813	Subdoligranulum	7	2	14	1	0	65	2	17	16	6	0	31	4	15	1	11	0	0	1	5	0	65	16	1	5	2	7	29	7	79	0	19	33	4	5	0	12	31	3	3	4	11	34	2	211	8	0	12
denovo5312	Unclassified bacteria	20	0	30	7	0	66	9	19	13	32	0	4	4	3	0	6	0	0	0	3	0	168	82	0	1	8	2	76	6	376	1	216	41	5	4	3	9	30	2	0	8	13	71	6	48	11	7	14
denovo9442	Brachybacterium	2	0	49	0	0	3	0	0	0	0	0	2	0	0	0	5	0	0	0	1	3	10	7	1	3	0	1	3	3	1	0	1	0	3	0	2	0	2	0	3	0	1	0	2	1	0	0	0
denovo724	Lactobacillus	0	0	0	8	0	1	0	33	0	199	102	20	0	4	135	1	575	9	364	40	127	1	0	0	0	142	6	2	0	0	497	0	0	25	60	0	22	0	127	21	20	0	0	2	0	12	12	31
denovo9565	Flavonifractor	4	0	4	0	0	61	3	5	0	15	0	10	1	0	0	6	0	0	0	0	0	111	75	0	1	10	0	17	0	214	0	186	6	3	5	1	1	6	2	5	4	6	44	1	59	2	2	21
denovo8623	Brevibacterium	0	0	10	0	0	1	0	0	0	0	0	2	0	0	1	4	0	0	0	0	0	21	3	1	5	0	2	2	1	1	0	0	0	3	0	0	0	5	0	0	0	1	0	0	6	0	0	0
denovo8439	Campylobacter	0	0	0	0	0	0	0	0	0	1	0	3	0	0	0	2	0	0	0	0	0	0	0	0	0	0	0	12	0	0	2	17	0	0	0	0	1	0	0	0	0	2	67	0	3	1	1	94
denovo8122	Jeotgalicoccus	52	0	113	0	0	8	3	0	0	1	0	14	0	1	1	46	0	1	0	1	6	24	21	7	69	0	23	17	20	3	0	1	8	24	0	0	1	8	0	5	0	0	1	1	1	0	0	3
denovo10001	Lachnospiracea_incertae_sedis	111	2	206	12	8	60	68	85	70	497	0	25	9	18	3	67	1	2	0	4	1	34	63	0	5	5	8	21	16	186	3	23	87	4	2	3	6	13	4	5	9	21	30	11	25	4	7	14
denovo9328	Lactobacillus sp.	0	0	0	0	0	0	0	0	0	0	0	0	0	0	0	0	0	0	0	0	0	0	0	0	0	0	0	0	0	0	0	0	0	0	0	0	0	0	0	0	0	0	0	0	0	0	0	0
denovo6985	Butyricicoccus	5	0	9	1	0	44	1	14	5	4	1	2	0	0	0	1	0	0	0	1	0	231	31	0	0	3	0	27	2	117	3	176	63	1	4	1	1	8	8	3	8	13	84	2	107	8	12	45
denovo3906	Streptomyces	0	0	23	0	19	13	11	0	229	0	3	30	97	145	2	255	3	3	0	122	5	52	26	5	55	0	6	35	22	33	1	2	1	6	2	2	8	31	2	40	0	69	3	40	16	3	5	22
denovo480	Corynebacterium	26	0	1	0	0	1	0	0	1	0	0	0	0	1	0	6	0	0	0	0	0	61	4	3	7	0	17	1	9	4	1	0	1	5	0	0	1	5	0	1	0	0	0	1	0	0	0	0
denovo730	Nosocomiicoccus	0	0	0	0	0	0	0	0	0	0	0	0	0	0	0	0	0	0	0	0	0	0	1	1	2	0	0	1	0	0	0	1	0	2	0	1	0	2	0	1	0	2	0	2	5	1	0	25
denovo812	Clostridium sensu stricto	0	0	2	0	0	0	0	0	0	0	0	1	0	0	1	2	0	0	0	0	0	4	0	0	1	0	0	3	1	2	0	0	0	0	0	0	0	0	0	0	0	3	0	4	4	1	0	0
denovo1705	Faecalibacterium	0	0	1	0	0	1	1	0	0	0	0	4	0	5	0	15	0	0	0	0	0	175	26	0	2	1	0	56	1	70	0	46	10	1	3	0	2	21	0	0	10	4	44	7	72	13	2	6
denovo7194	Unclassified bacteria	12	0	11	0	0	14	1	5	3	7	0	8	0	0	0	0	0	0	2	0	0	22	58	0	1	0	3	14	0	109	1	125	5	1	1	0	0	5	0	1	1	3	31	0	26	2	3	5
denovo9497	Streptococcus	14	3	24	2	1	32	18	5	72	0	1	8	1	34	2	66	1	3	1	18	3	68	55	3	27	1	34	52	24	7	2	0	2	1	7	3	14	51	1	17	4	52	1	81	64	4	3	29
denovo8184	Lactobacillus	1	1	0	15	1	0	0	51	0	118	79	8	1	6	101	0	145	18	65	19	82	0	14	1	1	92	47	6	6	0	142	0	2	119	42	0	26	1	184	28	29	0	1	20	2	7	39	46
denovo3072	Dietzia	2	0	94	0	0	1	0	0	2	0	0	0	2	1	0	3	0	0	0	1	1	1	1	1	10	0	0	0	4	1	0	0	0	1	0	0	0	0	2	3	0	1	0	0	1	0	0	1
[truncated: 93 more columns]
