# Supplementary material for: Succession of the turkey gastrointestinal bacterial microbiome related to weight gain
Source: PeerJ. 2013 Dec 23;1:e237. doi: 10.7717/peerj.237 (PMC3883494; doi:10.7717/peerj.237)
Supplement: Table S3 — At each week timepoint, red coloring indicates OTUs that are of significantly lower proportions in Heavy versus Light groups, and green indicates OTUs that are of significantly higher proportions in Heavy versus Light groups. [file peerj-01-237-s009.xlsx]

## Sheet: Sheet1
Week 1
Name	Database Hit	mean(group1)	variance(group1)	std.err(group1)	mean(group2)	variance(group2)	std.err(group2)	pvalue
denovo9105	Lactobacillus reuteri/vaginalis	0.0651842	0.00339829	0.0291474	0	0	0	0.0378595
denovo4423	Anaerobacter	0.00011373	1.08787e-08	5.21505e-05	0.000701216	7.95683e-08	0.00019946	0.0174339
denovo812	Clostridium sensu stricto	8.8043e-05	1.41598e-08	5.94974e-05	0.000275552	1.21757e-09	2.46735e-05	0.0171074
denovo6673	Pseudomonas	0	0	0	0.000726856	1.02587e-07	0.000226481	0.0126653
denovo3677	Planococcaceae	0.00061736	6.32375e-07	0.00039761	0.00315533	1.99114e-06	0.000997782	0.0317934
Week 2
Name	Database Hit	mean(group1)	variance(group1)	std.err(group1)	mean(group2)	variance(group2)	std.err(group2)	pvalue
denovo9655	Lactobacillus salivarius	0.0912492	0.00302133	0.0274833	5.00626e-05	5.01252e-09	5.00626e-05	0.01775
denovo2305	Lactobacillus aviarius	0.253717	0.0349659	0.0934958	0.000175219	6.14034e-08	0.000175219	0.0316389
denovo822	Lactobacillus johnsonii	0.117061	0.00764437	0.043716	0	0	0	0.0324333
denovo5901	Clostridium XI	0.00291559	7.98614e-06	0.00141299	0.0234661	6.77572e-05	0.00582053	0.0168
denovo6313	Candidatus Arthromitus	0.0637426	0.0027995	0.0264551	0.360748	0.0248164	0.111392	0.0361361
denovo3504	Unclassified bacteria	0.000137209	5.69883e-09	3.77453e-05	2.50313e-05	1.25313e-09	2.50313e-05	0.04015
denovo6985	Butyricicoccus	0.00167868	1.79241e-06	0.000669405	6.43998e-05	8.29467e-09	6.43998e-05	0.0450611
denovo8184	Lactobacillus	0.000262913	5.24342e-08	0.000114493	0	0	0	0.0490083
denovo109	Lactobacillus	0.00016256	1.74504e-08	6.60501e-05	0	0	0	0.0411306
denovo5046	Lactobacillus	0.000525729	2.09294e-07	0.000228743	0	0	0	0.0484528
denovo9892	Ruminococcaceae	0.000684175	2.7906e-07	0.000264131	0	0	0	0.0363083
denovo2624	Lactobacillus	0.000726445	3.3567e-07	0.000289685	0	0	0	0.0380583
denovo7336	Lactobacillus	0.000413414	1.11323e-07	0.000166826	0	0	0	0.0395944
denovo6016	Clostridiales	0.000111981	1.22875e-08	5.54245e-05	0.000622374	9.35152e-10	2.16235e-05	0.002825
denovo2327	Lactobacillus	0.000125248	7.53731e-09	4.34088e-05	0	0	0	0.0256833
denovo9182	Lactobacillus	0.000125255	1.08833e-08	5.21616e-05	0	0	0	0.0445056
denovo3499	Bacteroides	0.000149571	1.50963e-08	6.14335e-05	0	0	0	0.0428028
denovo6301	Lactobacillus	0.000162838	1.40333e-08	5.92311e-05	0	0	0	0.0307056
denovo5930	Lactobacillus	0.000150312	1.17323e-08	5.41579e-05	0	0	0	0.0294111
denovo3996	Bifidobacterium	0.00113924	5.69618e-07	0.000377365	0	0	0	0.021325
denovo3954	Kaistia	0	0	0	0.000114462	4.11112e-10	1.43372e-05	0.00320833
denovo6754	Ruminococcaceae	0	0	0	0.000293325	1.73256e-08	9.30742e-05	0.0193944
Week 3
Name	Database Hit	mean(group1)	variance(group1)	std.err(group1)	mean(group2)	variance(group2)	std.err(group2)	pvalue
denovo9655	Lactobacillus salivarius	0.058951	0.00210775	0.0229551	0.000244376	6.27181e-09	5.59992e-05	0.0468685
denovo2305	Lactobacillus aviarius	0.313505	0.0173599	0.0658784	0.000663972	1.64988e-07	0.000287217	0.0160554
denovo4423	Anaerobacter	0.000275705	1.78474e-07	0.000211231	0.00403646	1.44635e-07	0.00026892	0.00542907
denovo812	Candidatus Arthromitus	2.50376e-05	2.50752e-09	2.50376e-05	0.000315018	4.28791e-10	1.46423e-05	0.00614187
denovo8184	Lactobacillus	0.000344554	7.30025e-08	0.000135095	0	0	0	0.0471073
denovo2874	Turicibacter	0	0	0	0.00075816	7.45202e-08	0.000193029	0.0209343
denovo109	Lactobacillus	0.000167924	5.25443e-09	3.62437e-05	0	0	0	0.0170692
denovo2460	Lactococcus	0.000497508	1.14183e-07	0.000168955	0.00399679	6.24752e-07	0.000558906	0.0106782
denovo8497	Unclassified bacteria	0.000389841	6.94912e-08	0.000131806	0.00114827	1.28505e-07	0.00025348	0.0406609
denovo9403	Lactococcus	0.000267541	1.99921e-08	7.06966e-05	0.00220216	7.97224e-08	0.000199653	0.00661938
denovo9318	Lactococcus	0.00031397	7.08336e-08	0.000133073	0.00258653	4.36715e-07	0.000467287	0.0168304
denovo7336	Lactobacillus	0.000280708	4.41852e-08	0.000105101	0	0	0	0.0399516
denovo4027	Lactobacillus	0	0	0	0.000931895	2.04377e-07	0.000319669	0.0339585
denovo7610	Erysipelotrichaceae	0.00212725	2.1535e-06	0.000733741	0	0	0	0.0344533
denovo4880	Raoultella	1.25188e-05	6.26879e-10	1.25188e-05	0.000170767	1.73858e-09	2.94837e-05	0.0148685
denovo1438	Veillonella	0.000112759	2.07323e-08	7.19936e-05	0.00124394	8.64201e-08	0.00020787	0.0132803
